# Supplementary material for: Speed-Breeding System in Soybean: Integrating Off-Site Generation Advancement, Fresh Seeding, and Marker-Assisted Selection
Source: Front Plant Sci. 2021 Aug 17;12:717077. doi: 10.3389/fpls.2021.717077 (PMC8416080; doi:10.3389/fpls.2021.717077)
Supplement: Supplementary Table 1 — The sources and maturity group of parents. [file Data_Sheet_1.xlsx]

## Sheet: Supplementary Table 1
Supplementary Table 1. The sources and maturity group of parents
Sources			Combination	MG of parents
Northeastern Spring Planting Region	Mohe, Heilongjiang	F3	Heihe49×700243	000 ~ 00
		F3	Heihe49×YJ2356	000 ~ 00
		F3	Heihe49×YJ002326	000 ~ 00
		F3	Heihe49×Beidou26	000 ~ 00
		F3	Heihe49×Beidou36	000 ~ 00
		F3	Heihe49×Beidou43	000 ~ 00
		F3	Heihe49×Beidou49	000 ~ 00
		F3	Heihe49×Beidou51	000 ~ 00
		F3	Heihe49×Beixing 1	000 ~ 00
		F3	Heihe49×Dengke 1568	000 ~ 00
		F3	Heihe49×Dongda 2	000 ~ 00
		F3	Heihe49×Zhonghuang908	000 ~ 00
Northeastern Spring Planting Region	Ganhe, Inner Mongolia	F4	Heihe45×Heihe35	000 ~ 00
		F4	Heihe45×YJ69	00 ~ 0
		F4	Heihe45×YJ002301	00 ~ 0
		F4	Heihe45×YJ002303	00 ~ 0
		F4	Heihe45×YJ002319	00 ~ 0
Northeastern Spring Planting Region	Suihua, Heilongjiang	F4	Suinong44×Huangjiang725	0 ~Ⅰ
		F4	Suinong44×Heihe36	0 ~Ⅰ
		F4	Suinong44×Suinong36	0 ~Ⅰ
		F4	Hefeng 50×Hai4500	0 ~Ⅰ
		F4	Suinong36×Hefeng 50	0 ~Ⅰ
Northeastern Spring Planting Region	Changchun, Jilin	F4	CM158×CK-P	Ⅱ
		F4	C0722-7-1×Changnong38	Ⅱ
		F4	Jinong 17×Jiyu 97	Ⅱ
		F4	Jinong 28×Jiujiao 9895-8	Ⅱ
		F5	Heinong 53×Chang 59	Ⅱ
		F5	Changmidou 30×Chang 59	Ⅱ
Northeastern Spring Planting Region	Shenyang, Liaoning	F4	Liaodou 38×Jiyu 82	Ⅲ
		F4	Liaodou 50×Tiedou 62	Ⅲ
		F4	Liao 08012-1-1×Jidou 17	Ⅲ
		F5	Tiedou 67×Liaodou 48	Ⅲ
		F5	Liao 06Q003×Yudou 25	Ⅲ
		F5	Liao 08006×Dongnong 53	Ⅲ
Yellow-Huai-Hai Valleys Summer Planting Region	Beijing	F3	Zhonghuang30×He 01-7-1	Ⅱ
		F3	Zhonghuang30×Ji 098113	Ⅱ
		F3	Zhonghuang30×Ji 10B9	Ⅱ
		F3	Handou 6×Yudou 12	Ⅱ
		F3	Handou 6×Handou 5	Ⅱ
		F3	Handou 6×Jindou 19	Ⅱ
Yellow-Huai-Hai Valleys Summer Planting Region	Xinxiang, Henan	F3	Zhonghuang303×2015Y7	Ⅲ
		F3	Zhonghuang303×2015Y13	Ⅲ

## Sheet: Supplementary Table 2
Supplementary Table 2. The primer sequences used in this study.
Gene	Primer Name	Primer Sequence	Purpose	Allele	Comment
E1	E106g-F	ACCTGAACTCAAATTGGAGGAACA	Cloning and sequencing
	E106g-R	AAACACCCTCATCATACAAATCCAT
E2	E210g-10F	CCTCCTCTTAGACAAGTTGACGG	Cloning and sequencing
	E210g-10R	ATCCTCATCTGCAGTTCTTGCTT
E3	E319g-F	TTGTGACAGTGAGTAAGGATGATGT	Cloning and sequencing		Fragment 1
	E319g-R	AGCATCATCCAATACCCTCCAATTA
E3	E3ex4-F	TACCTTCCTATGCTTGATACACG	Cloning and sequencing		Fragment 2
	E3ex4-R	CATATCTACATCACCTTACAAGAAG
E4	E4 20g-F	TACATTTCAAGTGCAGTTTGGGGCG	Cloning and sequencing
	E4 20g-R	CATTGCTGTTTGATGGAGGAATAAG
E1	E1_as_FAM	AAAGGGAGCAGTGTCAAAAGAAGAC	KASP (E1-SNP-as)	C	e1-nl in the HEX clusters
	E1_as_VIC	AAAGGGAGCAGTGTCAAAAGAAGAG		G(wildtype)
	E1_as_Reverse	GTTAGAGGCTTCGCATATGGTGGWTT
E1	E1_fs_FAM	AGAGGCTTCGCATATGGTGGATTT	KASP (E1-SNP-fs)	wildtype
	E1_fs_VIC	GAGGCTTCGCATATGGTGGATTC		deletion(A)
	E1_fs_Reverse	CCAACATGAGCAACCCTTCAGATGAAAG
E2	E2_ns_FAM	CCCATCAGAGGCATGTCTTATGA	KASP (E2-SNP-ns)	A(wildtype)
	E2_ns_VIC	CCCATCAGAGGCATGTCTTATGT		T
	E2_ns_Reverse	CTGTTTTGTTCTCTAGTGGACTCA
E3	E3_fs_FAM	GAACATCCTGCAAACTCAAACACTCTTG	KASP (E3-SNP-fs)	wildtype
	E3_fs_VIC	GAACATCCTGCAAACTCAAACACTCTTT		insertion(T)
	E3_fs_Reverse	GGGGCTCACCTTGCACCAGC
E3	E3_ns_FAM	GAACTAATTTCCCTAACTGCTG	KASP (E3-SNP-ns)	C(wildtype)
	E3_ns_VIC	GAACTAATTTCCCTAACTGCTA		T
	E3_ns_Reverse	GGTCAGGTTGTTGTAGCAGCCACGC
E4	E4_kes_FAM	AACAAATTCAGAGATATCATACCCATCT	KASP (E4-SNP-kes)	A(wildtype)
	E4_kes_VIC	AACAAATTCAGAGATATCATACCCATCA		T
	E4_kes_Reverse	GCAGCTTAGTAAAATTCTTGATGACTCAG
E3	E3_08557FW	TGGAGGGTATTGGATGATGC	Genotyping for InDel		Tsubokura et al, Ann. Bot., 2014, 113, 429-441
	E3_09908RV	CTAAGTCCGCCTCTGGTTTCAG
	E3Ha_1000RV	CGGTCAAGAGCCAACATGAG
	e3tr_0716RV	GTCCTATACAATTCTTTACGACG
E4	PhyA2-for	AGACGTAGTGCTAGGGCTAT	Genotyping for InDel		Tsubokura et al, Ann. Bot., 2014, 113, 429-441
	PhyA2-Rev/E4	GCATCTCGCATCACCAGATCA
	PhyA2-Rev/e4	GCTCATCCCTTCGAATTCAG

## Sheet: Supplementary Table 3
Supplementary Table 3. The phylotype and haplotype combinations of E1-E4 in hybrid progenies.
NO.	Combination	E1	E2	E3	E4	Prediction of the maturity group	GANHE_VE-R1	GANHE_VE-R1_STDEV	GANHE_VE-R7	GANHE_VE-R7_STDEV	MOHE_VE-R1	MOHE_VE-R1_STDEV	MOHE_VE-R7	MOHE_VE-R7_STDEV	GANHE_PLANT HIGHT/mm	GANHE_PLANT HIGHT_STDEV	GANHE_NUM OF STEM	GANHE_NUM OF STEM_STDEV	GANHE_NUM OF POD	GANHE_NUM OF POD_STDEV
1	1	e1-fs	e2-ns	e3-fs	e4-kes	Super early-maturing	31	0.707107	75.2	0.83666	34.8	0.447214	87.8	0.83666	316.667	35.1188	6.66667	0.57735	8.66667	1.52753
2	1	e1-fs	e2-ns	e3-fs	e4-kes	Super early-maturing	26.6	1.94936	76.2	0.83666	33.8	0.447214	90.2	0.83666	293.333	37.8594	7.66667	0.57735	11	3.60555
3	1	e1-fs	e2-ns	e3-fs	e4-kes	Super early-maturing	29.4	0.547723	82	1	34.8	0.447214	91.6	0.547723	220	45.8258	7	1	2.33333	2.88675
4	1	e1-fs	e2-ns	e3-fs	e4-kes	Super early-maturing	28.2	0.83666	79.2	0.83666	32.6	0.547723	84.4	0.894427	270	43.589	7.33333	0.57735	7.33333	2.51661
5	2	e1-fs	e2-ns	e3-fs	e4-new	Super early-maturing	29.4	0.547723	82.4	0.547723	36	0	91.6	0.547723	493.333	25.1661	9	0	10.3333	3.51188
6	2	e1-fs	e2-ns	e3-fs	e4-new	Super early-maturing	30.8	0.447214	75.6	0.547723	34.2	0.447214	84.2	0.83666	280	10	7	1	6.66667	3.51188
7	2	e1-fs	e2-ns	e3-fs	e4-new	Super early-maturing	29.4	0.547723	81	1.58114	34	0	86	0.72	310	60	8.66667	0.57735	10.3333	4.50925
8	2	e1-fs	e2-ns	e3-fs	e4-new	Super early-maturing	29.6	0.547723	79.8	0.83666	32.2	0.447214	83	0.88	290	10	7	1	8.66667	2.08167
9	2	e1-fs	e2-ns	e3-fs	e4-new	Super early-maturing	26	0	81.6	1.14018	34	0	83	0.67	220	20	6	1	3.66667	1.52753
10	2	e1-fs	e2-ns	e3-fs	e4-new	Super early-maturing	27.8	0.447214	77.6	1.14018	36	0.707107	83	0.8	293.333	25.1661	9	0	14.3333	2.3094
11	2	e1-fs	e2-ns	e3-fs	e4-new	Super early-maturing	29.2	0.83666	75.4	0.547723	34.4	0.547723	83.6	1.14018	326.667	77.6745	8	1	11	1.73205
12	3	e1-nl	e2-ns	e3-fs	e4-kes	Extremely-early group	32	0.707107	83.2	1.64317	31.6	0.547723	82.8	2.16795	336.667	25.1661	11.3333	0.57735	16	3
13	3	e1-nl	e2-ns	e3-fs	e4-kes	Extremely-early group	31.4	0.547723	75.8	0.83666	33.6	0.547723	91.8	0.83666	310	17.3205	7.33333	0.57735	9	2.64575
14	3	e1-nl	e2-ns	e3-fs	e4-kes	Extremely-early group	28.4	1.14018	82	1	36.4	0.547723	99.2	0.83666	233.333	25.1661	8	1	8.33333	3.05505
15	3	e1-nl	e2-ns	e3-fs	e4-kes	Extremely-early group	29.6	0.547723	85.6	1.51658	36.8	0.447214	101.6	0.547723	330	72.111	8.66667	0.57735	11.6667	3.05505
16	3	e1-nl	e2-ns	e3-fs	e4-kes	Extremely-early group	39.6	1.14018	83.4	0.547723	34.2	0.447214	NA	NA	320	10	9	0	8.66667	2.3094
17	3	e1-nl	e2-ns	e3-fs	e4-kes	Extremely-early group	30.6	1.14018	82.8	0.83666	32.4	0.547723	NA	NA	346.667	50.3322	7.66667	0.57735	11	4
18	3	e1-nl	e2-ns	e3-fs	e4-kes	Extremely-early group	23.4	1.14018	72.2	0.83666	35.2	0.447214	NA	NA	356.667	51.316	8.33333	0.57735	14.6667	3.05505
19	3	e1-nl	e2-ns	e3-fs	e4-kes	Extremely-early group	27.8	1.30384	80	0.707107	37.8	0.447214	NA	NA	260	60.8276	8	1	9.66667	2.3094
20	3	e1-nl	e2-ns	e3-fs	e4-kes	Extremely-early group	27.2	0.83666	79.8	0.83666	37.2	0.447214	NA	NA	373.333	64.291	7.33333	0.57735	13	2
21	3	e1-nl	e2-ns	e3-fs	e4-kes	Extremely-early group	28.2	1.30384	79.8	0.83666	33.4	0.547723	NA	NA	353.333	35.1188	10	0	9.33333	4.04145
22	3	e1-nl	e2-ns	e3-fs	e4-kes	Extremely-early group	28	1.22474	80.2	0.83666	36.4	0.547723	NA	NA	336.667	104.083	10	0	15.3333	3.21455
23	3	e1-nl	e2-ns	e3-fs	e4-kes	Extremely-early group	32.2	0.83666	84	1	32	1	81.8	NA	360	36.0555	5	1	6.66667	2.51661
24	3	e1-nl	e2-ns	e3-fs	e4-kes	Extremely-early group	32.4	0.894427	83.4	1.81659	35.6	0.547723	82.4	NA	453.333	35.1188	12	0	19	3.60555
25	3	e1-nl	e2-ns	e3-fs	e4-kes	Extremely-early group	31	0.707107	77.4	0.894427	31.6	0.547723	84	NA	293.333	41.6333	9.33333	0.57735	16	1
26	3	e1-nl	e2-ns	e3-fs	e4-kes	Extremely-early group	32.4	1.94936	93.8	1.30384	49.4	0.547723	NA	NA	373.333	81.4453	9	1	6.66667	4.50925
27	3	e1-nl	e2-ns	e3-fs	e4-kes	Extremely-early group	27.4	0.547723	80.4	1.51658	35.6	0.547723	83.2	NA	373.333	86.2168	10.3333	0.57735	16	3.60555
28	4	e1-nl	e2-ns	e3-fs	e4-new	Extremely-early group	32.8	1.30384	84.2	0.83666	35.4	0.547723	NA	NA	293.333	20.8167	10	0	28.3333	1.1547
29	4	e1-nl	e2-ns	e3-fs	e4-new	Extremely-early group	29.6	0.547723	80.8	0.83666	35.2	0.447214	87	NA	420	100	10.6667	0.57735	22.3333	2.3094
30	4	e1-nl	e2-ns	e3-fs	e4-new	Extremely-early group	27.2	0.83666	79	0.707107	34.8	0.447214	NA	NA	280	55.6776	9.33333	0.57735	11.6667	4.50925
31	4	e1-nl	e2-ns	e3-fs	e4-new	Extremely-early group	26.8	1.64317	77.6	1.14018	36.2	0.447214	91.4	NA	443.333	72.3418	11	0	20	3.60555
32	4	e1-nl	e2-ns	e3-fs	e4-new	Extremely-early group	25	1	76.4	1.14018	36.4	0.547723	NA	NA	290	75.4983	9.33333	0.57735	11.6667	2.51661
33	4	e1-nl	e2-ns	e3-fs	e4-new	Extremely-early group	25.4	1.14018	78.2	1.30384	36.8	0.447214	NA	NA	333.333	65.0641	7	1	11.3333	0.57735
34	4	e1-nl	e2-ns	e3-fs	e4-new	Extremely-early group	25.8	1.30384	76.4	1.14018	37	0	NA	NA	290	26.4575	9	1	16	2
35	4	e1-nl	e2-ns	e3-fs	e4-new	Extremely-early group	26.4	1.14018	76.6	1.14018	37	0	NA	NA	406.667	40.4145	9	1	11	1
36	5	e1-nl	e2-ns	e3-fs	e4-SORE-1	Extremely-early group	29.2	0.83666	80.2	0.83666	36	0	89.8	NA	250	62.45	8.33333	0.57735	7.66667	4.50925
37	5	e1-nl	e2-ns	e3-fs	e4-SORE-1	Extremely-early group	27.2	1.09545	80.2	0.83666	36.2	0.447214	90	NA	306.667	55.0757	7	0	9.33333	3.05505
38	5	e1-nl	e2-ns	e3-fs	e4-SORE-1	Extremely-early group	30.4	0.547723	81	0.707107	36	0	85	NA	266.667	15.2753	8	0	12.6667	2.08167
39	5	e1-nl	e2-ns	e3-fs	e4-SORE-1	Extremely-early group	29	0.707107	81.4	0.547723	35.4	0.547723	84.8	NA	336.667	85.049	7.66667	0.57735	13	2.64575
40	5	e1-nl	e2-ns	e3-fs	e4-SORE-1	Extremely-early group	29.8	0.83666	84	1	36.8	0.447214	89.8	NA	410	60	10	1	18.6667	3.05505
41	6	e1-nl	e2-ns	e3-ns	e4-kes	Extremely-early group	31.4	0.547723	79	1.22474	36	0	NA	NA	450	81.8535	9.66667	0.57735	15.3333	3.05505
42	6	e1-nl	e2-ns	e3-ns	e4-kes	Extremely-early group	31.6	0.547723	81.6	1.14018	36.6	0.547723	NA	NA	443.333	125.033	11.3333	0.57735	20.3333	3.21455
43	6	e1-nl	e2-ns	e3-ns	e4-kes	Extremely-early group	27.8	0.83666	83.4	0.547723	36	0	NA	NA	373.333	35.1188	9.66667	0.57735	24.3333	1.52753
44	6	e1-nl	e2-ns	e3-ns	e4-kes	Extremely-early group	26.8	1.30384	79	0.707107	36	0.707107	NA	NA	290	52.915	8	1	16	4
45	6	e1-nl	e2-ns	e3-ns	e4-kes	Extremely-early group	26.8	1.64317	83	1	35	0	NA	NA	326.667	55.0757	10	1	19	4
46	6	e1-nl	e2-ns	e3-ns	e4-kes	Extremely-early group	22.8	0.447214	74.2	1.09545	36	0	NA	NA	283.333	56.8624	8	0	10.3333	4.04145
47	6	e1-nl	e2-ns	e3-ns	e4-kes	Extremely-early group	27.8	0.83666	78.8	0.83666	35.8	0.447214	90.4	NA	383.333	75.7188	9.33333	0.57735	8	4
48	6	e1-nl	e2-ns	e3-ns	e4-kes	Extremely-early group	26	1	79.6	0.894427	36.4	0.547723	NA	NA	350	65.5744	11	0	21.6667	2.51661
49	6	e1-nl	e2-ns	e3-ns	e4-kes	Extremely-early group	26.8	1.30384	74.2	0.83666	35.8	0.447214	NA	NA	343.333	56.8624	14	1	26.6667	0.57735
50	6	e1-nl	e2-ns	e3-ns	e4-kes	Extremely-early group	27.6	1.14018	78.8	0.83666	35	0	86.4	NA	383.333	25.1661	12	0	15.6667	1.1547
51	6	e1-nl	e2-ns	e3-ns	e4-kes	Extremely-early group	26.2	1.30384	78.8	0.83666	35.6	0.547723	86.6	NA	270	36.0555	9.33333	0.57735	11.6667	2.51661
52	6	e1-nl	e2-ns	e3-ns	e4-kes	Extremely-early group	29.8	0.83666	84.4	0.547723	36.2	0.447214	88.2	NA	233.333	20.8167	8	0	13.6667	1.1547
53	6	e1-nl	e2-ns	e3-ns	e4-kes	Extremely-early group	26.8	0.83666	80.8	0.83666	36.2	0.447214	85	NA	300	45.8258	9.33333	0.57735	13	4
54	6	e1-nl	e2-ns	e3-ns	e4-kes	Extremely-early group	27.8	0.83666	84.6	1.51658	37	0	NA	NA	356.667	58.5947	8.33333	0.57735	32	4
55	6	e1-nl	e2-ns	e3-ns	e4-kes	Extremely-early group	28.4	0.547723	81.8	0.83666	37	0	NA	NA	330	30	9.66667	0.57735	18.3333	2.3094
56	6	e1-nl	e2-ns	e3-ns	e4-kes	Extremely-early group	25.8	1.09545	80.2	0.83666	36.4	0.547723	100.6	NA	393.333	20.8167	9.33333	0.57735	16	3
57	6	e1-nl	e2-ns	e3-ns	e4-kes	Extremely-early group	27.2	0.83666	82.2	0.83666	36.4	0.547723	NA	NA	376.667	40.4145	12.3333	0.57735	19	1.73205
58	6	e1-nl	e2-ns	e3-ns	e4-kes	Extremely-early group	28.2	0.83666	79.4	0.547723	35.8	0.447214	NA	NA	316.667	45.0925	10.3333	0.57735	15.6667	3.05505
59	6	e1-nl	e2-ns	e3-ns	e4-kes	Extremely-early group	29	1	81.8	1.30384	35	0	NA	NA	250	45.8258	6.66667	0.57735	7	1.73205
60	6	e1-nl	e2-ns	e3-ns	e4-kes	Extremely-early group	28.8	1.30384	84.4	0.547723	36	0	NA	NA	333.333	128.97	11.3333	0.57735	23	4
61	6	e1-nl	e2-ns	e3-ns	e4-kes	Extremely-early group	29.8	0.83666	81.6	1.14018	35.8	0.447214	NA	NA	226.667	65.0641	7.33333	0.57735	5.33333	4.04145
62	6	e1-nl	e2-ns	e3-ns	e4-kes	Extremely-early group	28	1.41421	81.2	0.83666	33.8	0.447214	NA	NA	280	75.4983	6.66667	0.57735	4.66667	2.3094
63	6	e1-nl	e2-ns	e3-ns	e4-kes	Extremely-early group	31.6	0.547723	83.6	0.894427	32.8	0.447214	NA	NA	346.667	94.5163	9.66667	0.57735	10.3333	2.3094
64	6	e1-nl	e2-ns	e3-ns	e4-kes	Extremely-early group	30.2	1.48324	83.2	0.83666	33.6	0.547723	NA	NA	303.333	80.2081	8.66667	0.57735	9.33333	1.52753
65	6	e1-nl	e2-ns	e3-ns	e4-kes	Extremely-early group	26.2	0.83666	84.2	0.83666	36.2	0.447214	NA	NA	340	65.5744	10.6667	0.57735	14.3333	4.04145
66	6	e1-nl	e2-ns	e3-ns	e4-kes	Extremely-early group	32.6	0.547723	81	0.707107	33.2	0.447214	NA	NA	276.667	68.0686	8	0	17.6667	4.50925
67	6	e1-nl	e2-ns	e3-ns	e4-kes	Extremely-early group	31.4	0.547723	81.8	0.83666	35.8	0.447214	NA	NA	370	65.5744	10	0	28.3333	2.08167
68	6	e1-nl	e2-ns	e3-ns	e4-kes	Extremely-early group	26.4	1.34164	76.4	1.34164	35	0	87	NA	323.333	15.2753	9	1	12.6667	0.57735
69	6	e1-nl	e2-ns	e3-ns	e4-kes	Extremely-early group	23.4	0.894427	80.2	0.83666	36.2	0.447214	NA	NA	246.667	41.6333	9.33333	0.57735	18.3333	1.52753
70	7	e1-nl	e2-ns	e3-ns	e4-new	Extremely-early group	27.6	1.51658	77.6	1.51658	34.8	0.447214	NA	NA	390	36.0555	8.33333	0.57735	19.6667	1.52753
71	7	e1-nl	e2-ns	e3-ns	e4-new	Extremely-early group	26.2	0.83666	77.2	1.30384	35	0.707107	NA	NA	310	10	9.66667	0.57735	18	2
72	7	e1-nl	e2-ns	e3-ns	e4-new	Extremely-early group	26.6	1.67332	73.6	0.894427	35.8	0.447214	NA	NA	363.333	47.2582	9.66667	0.57735	15.6667	4.50925
73	7	e1-nl	e2-ns	e3-ns	e4-new	Extremely-early group	26.4	0.547723	75.8	0.447214	37	0.707107	89.6	NA	276.667	41.6333	10.3333	0.57735	9	5
74	7	e1-nl	e2-ns	e3-ns	e4-new	Extremely-early group	28.6	1.14018	82.6	1.14018	37	0.707107	92	NA	396.667	30.5505	9.33333	0.57735	19.3333	3.05505
75	7	e1-nl	e2-ns	e3-ns	e4-new	Extremely-early group	29	0.707107	78.4	0.894427	36.2	0.447214	90.4	NA	333.333	45.0925	8.33333	0.57735	10	3.60555
76	7	e1-nl	e2-ns	e3-ns	e4-new	Extremely-early group	28.2	0.83666	80.8	0.83666	36.8	0.447214	NA	NA	390	55.6776	7	1	11.3333	2.51661
77	7	e1-nl	e2-ns	e3-ns	e4-new	Extremely-early group	29.4	0.547723	76.2	1.09545	35.2	0.447214	NA	NA	246.667	70.2377	8.33333	0.57735	8.66667	2.08167
78	7	e1-nl	e2-ns	e3-ns	e4-new	Extremely-early group	26.4	1.81659	79.8	0.83666	34.8	0.447214	92.2	NA	246.667	15.2753	8	1	12	3
79	7	e1-nl	e2-ns	e3-ns	e4-new	Extremely-early group	27.6	1.51658	79	1	36.6	0.547723	90.6	NA	303.333	45.0925	10	0	19	2
80	7	e1-nl	e2-ns	e3-ns	e4-new	Extremely-early group	27.2	1.30384	83.6	0.547723	37.2	0.447214	91.2	NA	273.333	49.3288	9	1	5.66667	2.3094
81	7	e1-nl	e2-ns	e3-ns	e4-new	Extremely-early group	34.2	0.83666	84.2	0.83666	36	0	NA	NA	306.667	60.2771	8.33333	0.57735	19.6667	1.52753
82	7	e1-nl	e2-ns	e3-ns	e4-new	Extremely-early group	29.8	0.83666	84	0.707107	35	0	NA	NA	326.667	50.3322	10	0	16	1
83	7	e1-nl	e2-ns	e3-ns	e4-new	Extremely-early group	27.2	0.83666	79.8	0.83666	35.6	0.547723	91.8	NA	423.333	107.858	12.3333	0.57735	18.3333	3.51188
84	7	e1-nl	e2-ns	e3-ns	e4-new	Extremely-early group	28.8	1.64317	77.8	0.83666	35.2	0.447214	NA	NA	303.333	40.4145	8.66667	0.57735	11.6667	4.50925
85	7	e1-nl	e2-ns	e3-ns	e4-new	Extremely-early group	25	1.58114	79.2	0.83666	36.2	0.447214	NA	NA	393.333	102.632	10	1	10	2.64575
86	8	e1-nl	e2-ns	e3-ns	e4-SORE-1	Extremely-early group	30.6	0.547723	85.8	1.30384	36	0	NA	NA	350	45.8258	11	0	15	1
87	8	e1-nl	e2-ns	e3-ns	e4-SORE-1	Extremely-early group	26	1	85.2	0.83666	36.4	0.547723	NA	NA	506.667	40.4145	13	0	26	2.64575
88	8	e1-nl	e2-ns	e3-ns	e4-SORE-1	Extremely-early group	28.8	0.83666	85.2	0.83666	37.8	0.447214	NA	NA	390	20	12.3333	0.57735	27.3333	1.52753
89	8	e1-nl	e2-ns	e3-ns	e4-SORE-1	Extremely-early group	28.2	0.83666	84	0.707107	36.8	0.447214	NA	NA	393.333	20.8167	9.66667	0.57735	20.3333	2.51661
90	8	e1-nl	e2-ns	e3-ns	e4-SORE-1	Extremely-early group	27.8	0.83666	83	0.707107	36	0	NA	NA	370	85.44	10	0	21.3333	2.51661
91	8	e1-nl	e2-ns	e3-ns	e4-SORE-1	Extremely-early group	28.2	0.83666	84	1	36.6	0.547723	NA	NA	383.333	40.4145	9.66667	0.57735	19.6667	3.51188
92	8	e1-nl	e2-ns	e3-ns	e4-SORE-1	Extremely-early group	28.4	0.547723	82.6	0.894427	36	0	NA	NA	366.667	95.0438	9	1	12	4
93	8	e1-nl	e2-ns	e3-ns	e4-SORE-1	Extremely-early group	27	1.22474	82	0.707107	36	0	NA	NA	310	81.8535	7	1	13.6667	3.05505
94	8	e1-nl	e2-ns	e3-ns	e4-SORE-1	Extremely-early group	25.4	1.94936	82	0.707107	35.4	0.547723	NA	NA	346.667	20.8167	9.33333	0.57735	20	2.64575
95	8	e1-nl	e2-ns	e3-ns	e4-SORE-1	Extremely-early group	26.8	1.92354	82.2	0.83666	35.8	0.447214	NA	NA	426.667	76.3763	11.6667	0.57735	16.3333	2.51661
96	8	e1-nl	e2-ns	e3-ns	e4-SORE-1	Extremely-early group	28	1	82.6	0.547723	36.2	0.447214	NA	NA	420	60.8276	11.3333	0.57735	24.6667	4.50925
97	8	e1-nl	e2-ns	e3-ns	e4-SORE-1	Extremely-early group	26.8	1.64317	84.2	0.83666	36.6	0.547723	NA	NA	373.333	94.5163	10	1	12.6667	4.04145
98	8	e1-nl	e2-ns	e3-ns	e4-SORE-1	Extremely-early group	30	0.707107	82.4	0.547723	34.6	0.894427	84.8	NA	300	20	9	1	13.6667	2.08167
99	8	e1-nl	e2-ns	e3-ns	e4-SORE-1	Extremely-early group	30.8	0.447214	81.4	1.81659	33.4	0.547723	83	NA	400	10	8.33333	0.57735	10.6667	1.1547
100	9	e1-nl	e2-ns	e3-tr	e4-kes	Extremely-early group	34	1.22474	86.6	0.547723	33	0	NA	NA	266.667	41.6333	8	1	9	3.60555
101	9	e1-nl	e2-ns	e3-tr	e4-kes	Extremely-early group	27.2	2.38747	77.2	0.83666	34	0.707107	NA	NA	296.667	35.1188	9	0	6.33333	3.05505
102	9	e1-nl	e2-ns	e3-tr	e4-kes	Extremely-early group	31.4	0.547723	91.6	1.14018	38.4	0.547723	NA	NA	480	50	11	1	16.6667	3.05505
103	9	e1-nl	e2-ns	e3-tr	e4-kes	Extremely-early group	34.8	0.83666	77	0.707107	31.6	0.547723	82	NA	273.333	37.8594	9	0	10.3333	2.3094
104	9	e1-nl	e2-ns	e3-tr	e4-kes	Extremely-early group	31	0.707107	75.6	0.547723	35.4	0.547723	86.4	NA	246.667	25.1661	7.33333	0.57735	8.66667	2.51661
105	9	e1-nl	e2-ns	e3-tr	e4-kes	Extremely-early group	33.4	0.547723	75.8	0.83666	36.6	0.547723	87.2	NA	330	60.8276	10	0	19	3.60555
106	9	e1-nl	e2-ns	e3-tr	e4-kes	Extremely-early group	34.6	1.67332	89.2	0.83666	39.8	0.447214	NA	NA	376.667	116.762	12.6667	0.57735	24	3
107	9	e1-nl	e2-ns	e3-tr	e4-kes	Extremely-early group	28.8	1.09545	83.8	1.30384	35.8	0.447214	86.4	NA	253.333	20.8167	9	0	14	2.64575
108	10	e1-as	e2-ns	e3-fs	e4-kes	Early group	29.6	0.547723	80.6	1.51658	35.4	0.547723	82.4	NA	376.667	56.8624	8	0	8	3
109	10	e1-as	e2-ns	e3-fs	e4-kes	Early group	32.4	0.894427	85	1	36.8	0.83666	84.8	NA	456.667	35.1188	11.3333	0.57735	18	4
110	10	e1-as	e2-ns	e3-fs	e4-kes	Early group	28.8	1.09545	79.2	0.83666	35.8	0.447214	85.8	NA	393.333	90.7377	7.66667	0.57735	16	1.73205
111	10	e1-as	e2-ns	e3-fs	e4-kes	Early group	29.8	0.83666	81.4	1.81659	35.8	0.447214	86	NA	423.333	37.8594	12	0	25.6667	2.08167
112	10	e1-as	e2-ns	e3-fs	e4-kes	Early group	29.6	1.34164	75.2	0.83666	36.4	0.547723	86.2	NA	280	60	6.66667	0.57735	6.66667	4.50925
113	10	e1-as	e2-ns	e3-fs	e4-kes	Early group	29.4	0.894427	76.8	0.447214	36.2	0.447214	86.4	NA	326.667	66.5833	10.3333	0.57735	11.3333	2.3094
114	10	e1-as	e2-ns	e3-fs	e4-kes	Early group	29.6	1.14018	79.8	0.83666	35	0.707107	86.4	NA	360	36.0555	7.66667	0.57735	10	1
115	10	e1-as	e2-ns	e3-fs	e4-kes	Early group	29.8	0.83666	81.6	1.14018	33.8	0.83666	86.6	NA	303.333	45.0925	8	0	7	3
116	10	e1-as	e2-ns	e3-fs	e4-kes	Early group	25.8	0.447214	81.2	0.83666	35.6	0.547723	87.2	NA	393.333	65.0641	9.33333	0.57735	15.6667	1.52753
117	10	e1-as	e2-ns	e3-fs	e4-kes	Early group	29	1	83.4	0.894427	36	0	89.2	NA	563.333	55.0757	11	1	14.6667	4.04145
118	10	e1-as	e2-ns	e3-fs	e4-kes	Early group	27.8	1.64317	79.8	0.83666	36.2	0.447214	90.4	NA	310	51.9615	10	0	18.6667	4.50925
119	10	e1-as	e2-ns	e3-fs	e4-kes	Early group	31.4	0.547723	82.4	1.14018	37.8	0.447214	92.4	NA	376.667	104.083	10	1	14	2
120	10	e1-as	e2-ns	e3-fs	e4-kes	Early group	34	1	83	0.707107	37	0.707107	NA	NA	350	95.3939	9	1	18.6667	2.08167
121	10	e1-as	e2-ns	e3-fs	e4-kes	Early group	32.4	0.547723	84.6	1.34164	38.4	0.547723	NA	NA	336.667	35.1188	9.33333	0.57735	8.66667	4.50925
122	10	e1-as	e2-ns	e3-fs	e4-kes	Early group	33	0.707107	85.6	1.14018	39.6	0.547723	NA	NA	590	78.1025	10	1	26.6667	2.08167
123	10	e1-as	e2-ns	e3-fs	e4-kes	Early group	33.4	0.547723	85.2	1.30384	38.8	0.447214	NA	NA	366.667	15.2753	10	1	14.6667	2.08167
124	10	e1-as	e2-ns	e3-fs	e4-kes	Early group	29.8	0.447214	89.2	0.83666	54.8	0.83666	NA	NA	510	43.589	12	1	27	0
125	10	e1-as	e2-ns	e3-fs	e4-kes	Early group	29.8	0.83666	87.2	1.78885	54	1.22474	NA	NA	393.333	50.3322	9	0	7	2
126	10	e1-as	e2-ns	e3-fs	e4-kes	Early group	33.6	0.547723	88.8	0.83666	55	1.73205	NA	NA	460	85.44	8.66667	0.57735	15	1.73205
127	10	e1-as	e2-ns	e3-fs	e4-kes	Early group	24.8	0.83666	76.2	0.83666	38.6	0.547723	NA	NA	400	75.4983	8	1	10.3333	3.05505
128	10	e1-as	e2-ns	e3-fs	e4-kes	Early group	30.8	0.83666	78.6	0.547723	37.8	0.447214	NA	NA	426.667	40.4145	10	1	14	1.73205
129	10	e1-as	e2-ns	e3-fs	e4-kes	Early group	30.4	1.51658	93.6	1.14018	47.6	0.894427	NA	NA	483.333	20.8167	13.3333	0.57735	24.6667	3.05505
130	10	e1-as	e2-ns	e3-fs	e4-kes	Early group	29.8	0.83666	82.8	1.30384	38	0	NA	NA	590	206.64	14	1	33.3333	2.3094
131	10	e1-as	e2-ns	e3-fs	e4-kes	Early group	29.8	0.83666	95.8	0.83666	39.4	0.894427	NA	NA	613.333	32.1455	11.6667	0.57735	18.6667	1.52753
132	11	e1-as	e2-ns	e3-fs	e4-SORE-1	Early group	28.6	0.547723	81.2	1.30384	37	0.707107	86	NA	446.667	50.3322	9	0	10.3333	1.52753
133	11	e1-as	e2-ns	e3-fs	e4-SORE-1	Early group	30	0.707107	83.8	0.83666	37.4	0.894427	100.8	NA	373.333	68.0686	8	1	13	2
134	12	e1-as	e2-ns	e3-ns	e4-kes	Early group	24.8	0.83666	80.8	0.83666	36.6	0.547723	90.4	NA	416.667	40.4145	8	0	13	1
135	12	e1-as	e2-ns	e3-ns	e4-kes	Early group	36.4	1.67332	86.2	0.83666	37	0	90.6	NA	206.667	41.6333	9.33333	0.57735	7	1.73205
136	12	e1-as	e2-ns	e3-ns	e4-kes	Early group	32.8	0.83666	85.8	1.09545	40	1	100.8	NA	446.667	55.0757	9.33333	0.57735	14	2
137	12	e1-as	e2-ns	e3-ns	e4-kes	Early group	27.8	0.83666	84.6	0.547723	35	0	NA	NA	470	60	11.6667	0.57735	20	0
138	12	e1-as	e2-ns	e3-ns	e4-kes	Early group	24.6	0.894427	83.8	0.83666	35	0	NA	NA	380	43.589	9.66667	0.57735	15.3333	0.57735
139	12	e1-as	e2-ns	e3-ns	e4-kes	Early group	28.6	1.81659	84	1.22474	35.4	0.547723	NA	NA	370	52.915	11	1	14	2.64575
140	12	e1-as	e2-ns	e3-ns	e4-kes	Early group	33.6	1.34164	85	0.707107	35.8	0.83666	NA	NA	410	55.6776	8.66667	0.57735	16.3333	0.57735
141	12	e1-as	e2-ns	e3-ns	e4-kes	Early group	30	0.707107	82.8	0.83666	35.8	0.447214	NA	NA	223.333	65.0641	8	0	4.66667	0.57735
142	12	e1-as	e2-ns	e3-ns	e4-kes	Early group	29	1.41421	85.2	0.83666	35.8	0.447214	NA	NA	443.333	65.0641	12.3333	0.57735	13.6667	1.52753
143	12	e1-as	e2-ns	e3-ns	e4-kes	Early group	31.8	2.04939	82.6	1.14018	36	0	NA	NA	206.667	51.316	8.33333	0.57735	9.33333	3.21455
144	12	e1-as	e2-ns	e3-ns	e4-kes	Early group	28.4	1.34164	84.4	0.894427	36	0	NA	NA	420	100	8.33333	0.57735	10	3.60555
145	12	e1-as	e2-ns	e3-ns	e4-kes	Early group	30	0.707107	83.6	0.547723	36.4	0.547723	NA	NA	280	62.45	8	1	15.6667	2.08167
146	12	e1-as	e2-ns	e3-ns	e4-kes	Early group	28	2.91548	83.6	0.547723	36.4	0.547723	NA	NA	376.667	20.8167	8.66667	0.57735	9	2.64575
147	12	e1-as	e2-ns	e3-ns	e4-kes	Early group	26.8	0.447214	84.2	0.83666	36.4	0.547723	NA	NA	490	26.4575	12.6667	0.57735	17	1
148	12	e1-as	e2-ns	e3-ns	e4-kes	Early group	25	1.22474	84	0.707107	36.6	0.547723	NA	NA	420	52.915	8	0	11	2.64575
149	12	e1-as	e2-ns	e3-ns	e4-kes	Early group	29.6	1.14018	85	0.707107	36.6	0.547723	NA	NA	486.667	77.6745	13.3333	0.57735	29.3333	2.3094
150	12	e1-as	e2-ns	e3-ns	e4-kes	Early group	25.8	1.30384	79.8	0.83666	37	0	NA	NA	406.667	60.2771	9	0	11.3333	3.05505
151	12	e1-as	e2-ns	e3-ns	e4-kes	Early group	26	1	80.8	0.83666	37	0	NA	NA	403.333	76.3763	8	0	10.6667	0.57735
152	12	e1-as	e2-ns	e3-ns	e4-kes	Early group	24.6	0.894427	83.6	0.547723	37	0	NA	NA	320	50	7.66667	0.57735	11.3333	2.08167
153	12	e1-as	e2-ns	e3-ns	e4-kes	Early group	32.8	0.83666	84.4	0.894427	37.2	0.447214	NA	NA	373.333	25.1661	10.3333	0.57735	4.66667	3.05505
154	12	e1-as	e2-ns	e3-ns	e4-kes	Early group	31.2	0.447214	85	0.707107	37.2	0.83666	NA	NA	316.667	37.8594	10	1	12.3333	2.51661
155	12	e1-as	e2-ns	e3-ns	e4-kes	Early group	27.6	0.547723	82.2	0.83666	37.6	0.547723	NA	NA	316.667	47.2582	12	1	26	3
156	12	e1-as	e2-ns	e3-ns	e4-kes	Early group	28.2	1.30384	87.2	0.83666	37.6	0.547723	NA	NA	340	137.477	10.6667	0.57735	11	2.64575
157	12	e1-as	e2-ns	e3-ns	e4-kes	Early group	26.2	0.83666	85.8	0.83666	37.8	0.447214	NA	NA	400	90	11.6667	0.57735	17.3333	2.51661
158	12	e1-as	e2-ns	e3-ns	e4-kes	Early group	31.6	1.14018	85.4	0.547723	38	0	NA	NA	343.333	58.5947	8	0	8.33333	4.50925
159	12	e1-as	e2-ns	e3-ns	e4-kes	Early group	29.4	0.547723	85.6	1.51658	38.4	0.547723	NA	NA	340	55.6776	8.66667	0.57735	12.6667	2.88675
160	12	e1-as	e2-ns	e3-ns	e4-kes	Early group	27.4	2.30217	80.6	0.894427	38.4	0.547723	NA	NA	420	30	11	1	12.3333	3.51188
161	12	e1-as	e2-ns	e3-ns	e4-kes	Early group	29.4	1.51658	87.2	0.83666	38.6	0.547723	NA	NA	446.667	90.7377	9.66667	0.57735	15	3
162	12	e1-as	e2-ns	e3-ns	e4-kes	Early group	27.8	0.447214	85.8	0.83666	38.6	0.547723	NA	NA	333.333	35.1188	9.33333	0.57735	14	2
163	12	e1-as	e2-ns	e3-ns	e4-kes	Early group	31	0.707107	83.2	0.83666	38.8	0.447214	NA	NA	336.667	87.3689	11	1	16.3333	4.04145
164	12	e1-as	e2-ns	e3-ns	e4-kes	Early group	30	0.707107	87	0.707107	39.2	0.83666	NA	NA	443.333	41.6333	12	0	15.3333	3.21455
165	12	e1-as	e2-ns	e3-ns	e4-kes	Early group	25	0.707107	81	0.707107	39.2	0.447214	NA	NA	350	26.4575	8	0	9.66667	3.05505
166	12	e1-as	e2-ns	e3-ns	e4-kes	Early group	30.2	0.83666	84.8	0.83666	39.4	0.547723	NA	NA	456.667	70.946	11.6667	0.57735	19.6667	2.88675
167	12	e1-as	e2-ns	e3-ns	e4-kes	Early group	31.6	0.894427	84.4	0.547723	39.4	0.547723	NA	NA	453.333	76.3763	10	0	10	1
168	12	e1-as	e2-ns	e3-ns	e4-kes	Early group	34.4	1.94936	96.2	0.447214	42.8	0.83666	NA	NA	696.667	40.4145	15	0	47.6667	2.51661
169	12	e1-as	e2-ns	e3-ns	e4-kes	Early group	37.4	0.894427	83.6	0.547723	58.2	1.30384	NA	NA	446.667	46.188	10.6667	0.57735	20	1
170	12	e1-as	e2-ns	e3-ns	e4-kes	Early group	32.2	0.83666	87.6	0.894427	61	2.34521	NA	NA	473.333	30.5505	11	1	24.6667	2.51661
171	12	e1-as	e2-ns	e3-ns	e4-kes	Early group	32.4	1.14018	85	1.58114	62.4	0.547723	NA	NA	313.333	117.189	8	1	10.6667	4.04145
172	12	e1-as	e2-ns	e3-tr	e4-kes	Early group	27.6	1.67332	81	1.22474	35.2	0.447214	NA	NA	450	26.4575	11	0	22	3
173	12	e1-as	e2-ns	e3-tr	e4-kes	Early group	28.8	0.447214	77.2	0.83666	35.8	0.447214	NA	NA	280	30	7.33333	0.57735	5.33333	2.08167
174	12	e1-as	e2-ns	e3-tr	e4-kes	Early group	24.8	1.09545	76.6	1.14018	37.2	0.83666	NA	NA	386.667	37.8594	9.66667	0.57735	15.6667	4.50925
175	12	e1-as	e2-ns	e3-tr	e4-kes	Early group	30.8	1.92354	80.2	0.83666	37.2	0.447214	NA	NA	370	78.1025	10.6667	0.57735	16.6667	3.05505
176	13	e1-as	e2-ns	e3-ns	e4-new	Early group	29.6	0.547723	82.2	0.83666	36	0	83	NA	410	26.4575	12	0	20.3333	3.51188
177	13	e1-as	e2-ns	e3-ns	e4-new	Early group	28.8	0.83666	77	1.22474	34.4	0.547723	81.2	NA	326.667	70.2377	7	1	11.6667	4.04145
178	13	e1-as	e2-ns	e3-ns	e4-new	Early group	33	0.707107	81.8	0.83666	40	1.41421	NA	NA	303.333	35.1188	9	1	7.66667	3.21455
179	13	e1-as	e2-ns	e3-ns	e4-new	Early group	29	0.707107	79.2	1.30384	37.6	0.547723	NA	NA	296.667	90.7377	6.66667	0.57735	7	2.64575
180	14	e1-as	e2-ns	e3-tr	e4-new	Early group	34.6	0.547723	74.4	0.894427	31.8	0.447214	81.8	NA	233.333	20.8167	8	1	7.66667	2.88675
181	14	e1-as	e2-ns	e3-tr	e4-new	Early group	33.4	0.547723	89.4	1.14018	41.2	0.447214	NA	NA	463.333	32.1455	14	1	21.6667	3.21455
182	15	e1-nl	e2-ns	e3-fs	E4	Mid-early group	27.6	1.51658	89	1.22474	37.2	0.447214	NA	NA	483.333	104.083	12	0	10.3333	3.51188
183	15	e1-nl	e2-ns	e3-fs	E4	Mid-early group	26.4	0.547723	86.4	0.547723	36.2	0.447214	NA	NA	503.333	60.2771	15	0	34	2.64575
184	15	e1-nl	e2-ns	e3-fs	E4	Mid-early group	24.4	0.547723	78	1	35.8	0.447214	NA	NA	490	91.6515	9.66667	0.57735	14.6667	3.21455
185	15	e1-nl	e2-ns	e3-fs	E4	Mid-early group	27.2	0.83666	79.2	0.83666	37	0	NA	NA	346.667	35.1188	6	0	8.33333	2.51661
186	15	e1-nl	e2-ns	e3-fs	E4	Mid-early group	25	1	84.4	0.547723	35.2	0.447214	NA	NA	450	43.589	10.6667	0.57735	13.6667	3.21455
187	15	e1-nl	e2-ns	e3-fs	E4	Mid-early group	23.4	0.547723	87.6	0.894427	38.8	0.447214	NA	NA	353.333	72.3418	11.3333	0.57735	16	1.73205
188	15	e1-nl	e2-ns	e3-fs	E4	Mid-early group	31.6	0.547723	88	1.41421	38.2	0.447214	NA	NA	516.667	135.769	11	1	12.3333	3.21455
189	16	e1-nl	e2-ns	e3-tr	E4	Mid-early group	29.8	0.83666	87.8	0.83666	36	0	NA	NA	703.333	64.291	14.3333	0.57735	26.6667	2.51661
190	16	e1-nl	e2-ns	e3-tr	E4	Mid-early group	27	0.707107	80.4	1.14018	35.2	0.83666	NA	NA	406.667	50.3322	8.33333	0.57735	11.3333	2.88675
191	16	e1-nl	e2-ns	e3-tr	E4	Mid-early group	25	1	86.2	1.30384	38	0	NA	NA	403.333	56.8624	13.3333	0.57735	23.3333	4.50925
192	16	e1-nl	e2-ns	e3-tr	E4	Mid-early group	24.8	1.30384	81.2	9.09395	36	0	NA	NA	360	26.4575	9.33333	0.57735	15.6667	4.04145
193	16	e1-nl	e2-ns	e3-tr	E4	Mid-early group	25.8	1.48324	82.6	0.547723	36.4	0.547723	NA	NA	353.333	77.6745	10	0	11.6667	2.51661
194	16	e1-nl	e2-ns	e3-tr	E4	Mid-early group	27	1	82	0.707107	36	0.707107	NA	NA	320	62.45	10.3333	0.57735	13	2
195	16	e1-nl	e2-ns	e3-tr	E4	Mid-early group	26	1.58114	82	0.707107	37.2	0.447214	NA	NA	393.333	40.4145	11.3333	0.57735	11.6667	0.57735
196	16	e1-nl	e2-ns	e3-tr	E4	Mid-early group	35.4	1.81659	98	0.707107	47.6	0.894427	NA	NA	453.333	73.7111	13	0	17	3.60555
197	17	e1-as	e2-ns	e3-fs	E4	Mid-early group	31	1.73205	81.4	1.14018	31.8	0.83666	NA	NA	280	10	10	0	14.3333	0.57735
198	17	e1-as	e2-ns	e3-fs	E4	Mid-early group	31.2	0.83666	76.4	0.547723	32.6	0.547723	NA	NA	326.667	23.094	13	0	33.6667	2.08167
199	17	e1-as	e2-ns	e3-fs	E4	Mid-early group	31.8	0.83666	77.6	0.894427	31.8	0.447214	NA	NA	413.333	94.5163	9.66667	0.57735	10	1
200	17	e1-as	e2-ns	e3-fs	E4	Mid-early group	33.6	3.20936	90.2	0.83666	60	1	NA	NA	536.667	77.6745	12	0	15.6667	2.08167
201	17	e1-as	e2-ns	e3-fs	E4	Mid-early group	41.2	0.83666	83.4	0.547723	60	0.707107	NA	NA	730	72.111	16	0	50.6667	2.08167
202	18	e1-as	e2-ns	e3-tr	E4	Mid-early group	29.6	0.547723	94.8	0.83666	37.8	0.447214	NA	NA	683.333	179.536	16	1	26.6667	4.50925
203	18	e1-as	e2-ns	e3-tr	E4	Mid-early group	24	0.707107	90	1.58114	38.2	0.447214	NA	NA	323.333	50.3322	10.6667	0.57735	18	2
204	18	e1-as	e2-ns	e3-tr	E4	Mid-early group	35	3.24037	89.4	0.547723	41.2	0.83666	NA	NA	473.333	100.167	11	0	20.6667	2.08167
205	18	e1-as	e2-ns	e3-tr	E4	Mid-early group	36.4	1.51658	97.4	0.547723	39.8	0.447214	NA	NA	663.333	60.2771	16	0	45	1.73205
206	18	e1-as	e2-ns	e3-tr	E4	Mid-early group	35	2	97.2	0.83666	40.6	0.547723	NA	NA	596.667	30.5505	15.3333	0.57735	28	1.73205
207	18	e1-as	e2-ns	e3-tr	E4	Mid-early group	31	0.707107	95.2	0.83666	57.4	0.894427	NA	NA	643.333	110.604	12	1	22.3333	0.57735
208	18	e1-as	e2-ns	e3-tr	E4	Mid-early group	32.2	1.09545	92	1.22474	38.4	0.547723	NA	NA	593.333	15.2753	11.6667	0.57735	15.3333	1.52753
209	18	e1-as	e2-ns	e3-tr	E4	Mid-early group	33.8	1.30384	86.8	0.83666	42.6	0.547723	NA	NA	280	36.0555	9	0	11.3333	2.51661
210	18	e1-as	e2-ns	e3-tr	E4	Mid-early group	30	0.707107	95.8	0.83666	40.4	0.547723	NA	NA	533.333	76.3763	16	1	40.6667	3.05505
211	18	e1-as	e2-ns	e3-tr	E4	Mid-early group	29.4	0.547723	87.2	1.92354	38.4	0.547723	NA	NA	640	45.8258	15	0	37.3333	2.3094
